# Supplementary material
Source: PubMed Central journal article supplement (PMC2732984)

**Web Figure 1.** Study-specific genetic model unrestricted parameters ( $\lambda^i$ ) for *A*) the *NOTCH2* locus and *B*) the *ADAMTS9* locus, synthesized using a random-effects model (3). The studies refer to data generated through the efforts of the DIAGRAM consortium. Details on the contributing data sets can be found in references 10–14.

A) Forest Plot for  $\lambda$  Estimated in WinBUGS (*NOTCH2*)

Estimate (With 95% Confidence Interval)

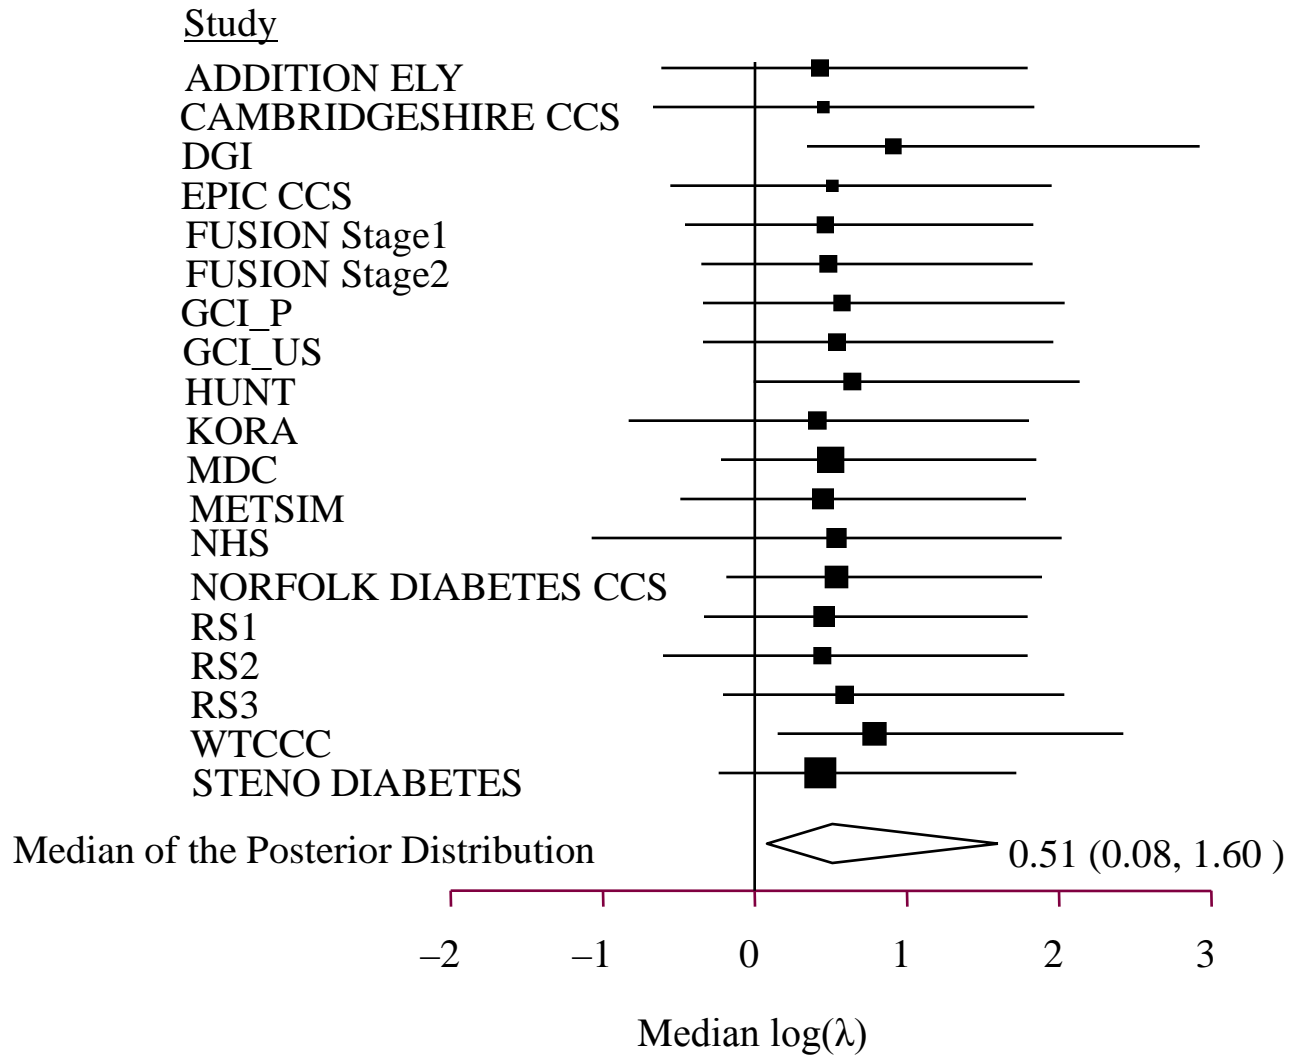

## B) Forest Plot for $\lambda$ Estimated in WinBUGS (*ADAMTS9*)

Estimate (With 95% Confidence Interval)

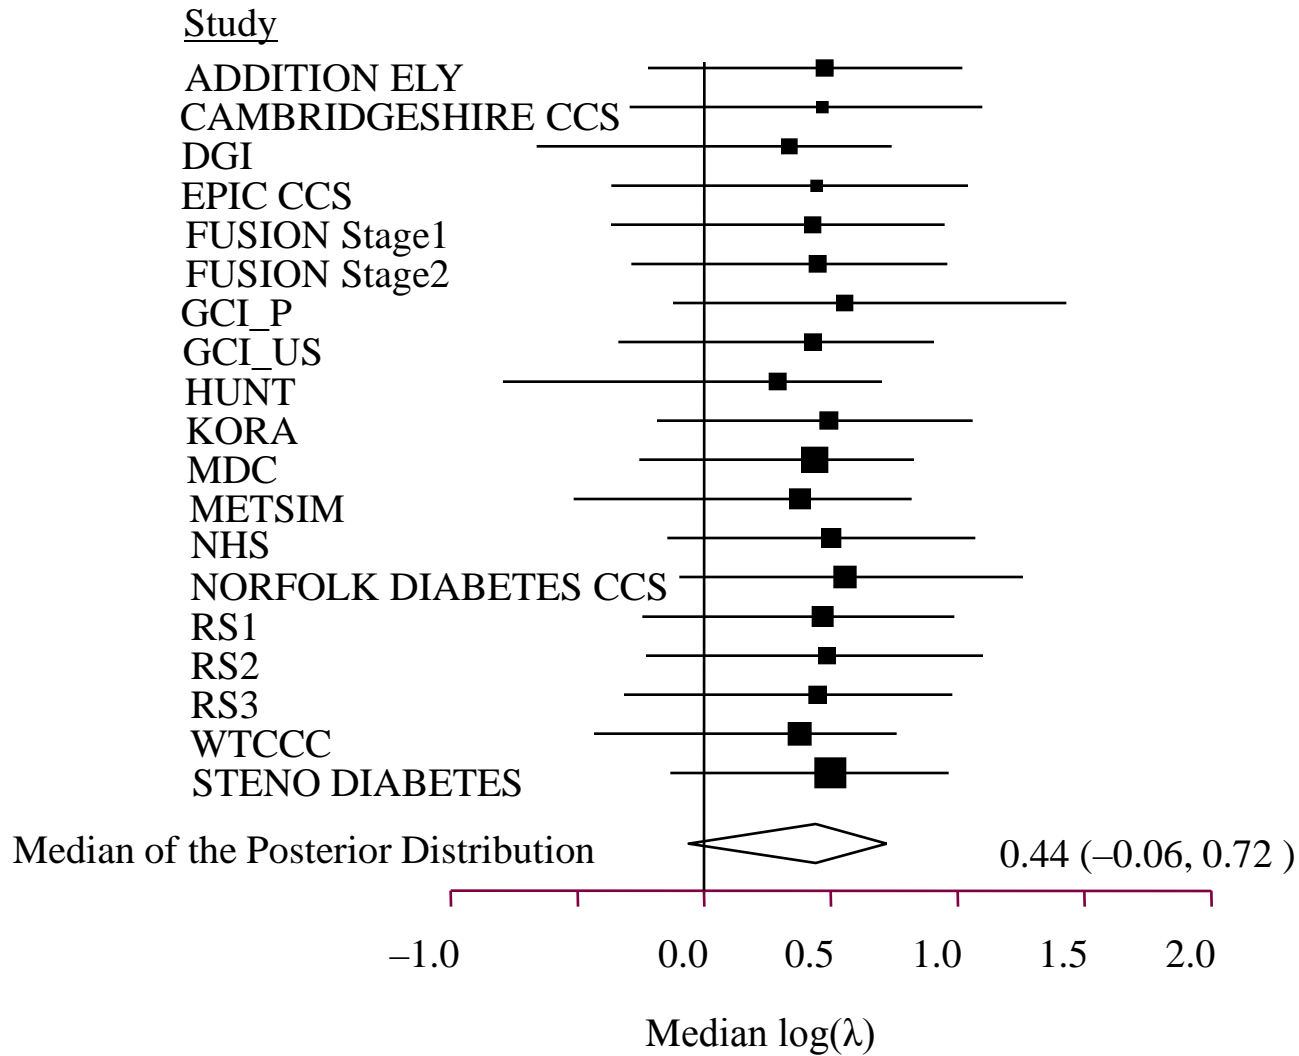

Supplement: kwp145_1.pdf [file kwp145_1.pdf]
