# Supplementary material
Source: PubMed Central journal article supplement (PMC2732984)
Supplement: kwp145_2.pdf [file kwp145_2.pdf]

Web Table 1.

| SNP                       | DGI   |          | MDC   |          | GCI_P |          | GCI_US |          | FUSION STAGE 1 |          | FUSION STAGE 2 |          | HUNT  |          | METSIM |          | KORA  |          | NHS   |          | RS1   |          | RS2   |          | RS3   |          | WTCCC |          | STENO DIABETES |          | ADDITION ELY |          | CAMBRIDGSHIRE CCS |          | EPIC CCS |          | NORFOLK DIABETES CCS |          | Total        |              |
|---------------------------|-------|----------|-------|----------|-------|----------|--------|----------|----------------|----------|----------------|----------|-------|----------|--------|----------|-------|----------|-------|----------|-------|----------|-------|----------|-------|----------|-------|----------|----------------|----------|--------------|----------|-------------------|----------|----------|----------|----------------------|----------|--------------|--------------|
|                           | Cases | Controls | Cases | Controls | Cases | Controls | Cases  | Controls | Cases          | Controls | Cases          | Controls | Cases | Controls | Cases  | Controls | Cases | Controls | Cases | Controls | Cases | Controls | Cases | Controls | Cases | Controls | Cases | Controls | Cases          | Controls | Cases        | Controls | Cases             | Controls | Cases    | Controls | Cases                | Controls | Cases        | Controls     |
| rs10923931 <sup>1,2</sup> | 990   | 1029     | 2777  | 3519     | 956   | 1176     | 1176   | 1154     | 1130           | 1137     | 1175           | 1221     | 991   | 1482     | 797    | 2955     | 1210  | 1516     | 1526  | 1570     | 1909  | 1905     | 608   | 1763     | 1067  | 1504     | 1875  | 2812     | 3900           | 4924     | 877          | 1567     | 522               | 517      | 374      | 746      | 2108                 | 2340     | <b>25968</b> | <b>34837</b> |
| rs7578597                 | 1007  | 1041     | 2816  | 3428     | 957   | 1184     | 1184   | 1156     | 1161           | 1174     | 1165           | 1220     | 996   | 1486     | 796    | 2988     | 1210  | 1519     | 1560  | 2056     | 1886  | 1893     | 600   | 1736     | 1062  | 1480     | 1550  | 2861     | 3886           | 4903     | 827          | 1516     | 545               | 526      | 375      | 748      | 2078                 | 2328     | <b>25661</b> | <b>35243</b> |
| rs1801282                 | 1022  | 1075     | 2827  | 3404     | 931   | 1164     | 1164   | 1128     | 1151           | 1159     | 1158           | 1208     | 1000  | 1483     | 797    | 2967     | 1217  | 1513     | 1591  | 2124     | 2005  | 2013     | 194   | 1094     | 1087  | 1541     | 1924  | 2932     | 3962           | 4993     | 847          | 1540     | 521               | 511      | 370      | 744      | 2090                 | 2257     | <b>25858</b> | <b>34850</b> |
| rs4607103                 | 1014  | 1072     | 2813  | 3515     | 969   | 1183     | 1183   | 1158     | 1134           | 1155     | 1167           | 1222     | 982   | 1466     | 795    | 2979     | 1218  | 1506     | 1546  | 2022     | 1888  | 1882     | 605   | 1737     | 1055  | 1479     | 1921  | 2930     | 3881           | 4903     | 832          | 1516     | 512               | 506      | 384      | 762      | 2078                 | 2334     | <b>25977</b> | <b>35327</b> |
| rs4402960 <sup>3</sup>    | 1016  | 1070     | 2747  | 3407     | 958   | 1181     | 1181   | 1164     | 1140           | 1161     | 1198           | 1245     | 997   | 1488     | 794    | 2967     | 1212  | 1506     | 1457  | 2026     | 1922  | 1924     | 617   | 1633     | 1063  | 1514     | 1922  | 2932     | 3833           | 4862     | 845          | 1534     | 525               | 512      | 372      | 748      | 2132                 | 2331     | <b>25931</b> | <b>35205</b> |
| rs10010131                | 978   | 1025     | 2760  | 3301     | 891   | 1112     | 1112   | 1103     | 1160           | 1172     | 0              | 0        | 1001  | 1492     | 787    | 2960     | 1224  | 1516     | 1561  | 2078     | 1956  | 1966     | 613   | 1764     | 1066  | 1518     | 1549  | 1462     | 3899           | 4226     | 880          | 1598     | 546               | 529      | 383      | 768      | 2036                 | 2296     | <b>24402</b> | <b>31886</b> |
| rs10946398 <sup>4</sup>   | 1022  | 1075     | 2774  | 3459     | 949   | 1159     | 1159   | 1134     | 1118           | 1111     | 1159           | 1210     | 0     | 0        | 0      | 0        | 1216  | 1510     | 1575  | 2066     | 1920  | 1915     | 617   | 1627     | 1072  | 1513     | 1921  | 2938     | 3837           | 4883     | 828          | 1524     | 513               | 502      | 372      | 742      | 2106                 | 2331     | <b>24158</b> | <b>30699</b> |
| rs864745 <sup>5</sup>     | 1016  | 1068     | 2805  | 3420     | 943   | 1184     | 1184   | 1151     | 1130           | 1152     | 1156           | 1190     | 988   | 1479     | 794    | 2959     | 1204  | 1514     | 1524  | 2056     | 1903  | 1914     | 589   | 1450     | 1074  | 1514     | 1922  | 2932     | 3847           | 4887     | 884          | 1554     | 531               | 514      | 378      | 744      | 2060                 | 2328     | <b>25932</b> | <b>35010</b> |
| rs13266634                | 1006  | 1059     | 2672  | 3308     | 958   | 1186     | 1186   | 1163     | 1161           | 1174     | 1169           | 1214     | 994   | 1469     | 800    | 2971     | 1226  | 1517     | 1583  | 2090     | 1924  | 1925     | 577   | 1327     | 1071  | 1511     | 1550  | 2866     | 3868           | 4864     | 863          | 1572     | 531               | 518      | 374      | 755      | 2126                 | 2339     | <b>25639</b> | <b>34828</b> |
| rs10811661                | 1010  | 1058     | 2800  | 3491     | 961   | 1147     | 1147   | 1157     | 1124           | 1130     | 1179           | 1227     | 1002  | 1494     | 800    | 2978     | 1223  | 1513     | 1582  | 2077     | 1936  | 1923     | 618   | 1637     | 1076  | 1513     | 1924  | 2936     | 3881           | 4910     | 884          | 1556     | 530               | 517      | 380      | 748      | 2071                 | 2326     | <b>26128</b> | <b>35338</b> |
| rs12779790                | 1010  | 1049     | 2815  | 3432     | 955   | 1188     | 1188   | 1153     | 1103           | 1123     | 1152           | 1201     | 981   | 1462     | 781    | 2907     | 1166  | 1467     | 1547  | 2011     | 1887  | 1909     | 605   | 1755     | 1063  | 1488     | 1544  | 2860     | 3875           | 4906     | 838          | 1515     | 522               | 503      | 374      | 740      | 2028                 | 2288     | <b>25434</b> | <b>34957</b> |
| rs5015480 <sup>6</sup>    | 1002  | 1057     | 2573  | 2788     | 943   | 1178     | 1178   | 1151     | 1161           | 1174     | 1151           | 1206     | 984   | 1456     | 793    | 2972     | 1211  | 1523     | 1587  | 2088     | 1910  | 1905     | 610   | 1616     | 1073  | 1511     | 1545  | 2847     | 3855           | 4835     | 864          | 1518     | 529               | 505      | 380      | 752      | 2060                 | 2311     | <b>25409</b> | <b>34393</b> |
| rs7901695 <sup>7,8</sup>  | 787   | 894      | 2582  | 3476     | 924   | 1144     | 1144   | 1104     | 1159           | 1171     | 0              | 0        | 992   | 1478     | 779    | 2898     | 1208  | 1503     | 1568  | 2086     | 1936  | 1934     | 620   | 1632     | 0     | 0        | 1922  | 2931     | 2735           | 4747     | 867          | 1520     | 528               | 505      | 375      | 752      | 2090                 | 2294     | <b>22216</b> | <b>32069</b> |
| rs5219                    | 821   | 939      | 2766  | 3224     | 931   | 890      | 890    | 1062     | 1105           | 1129     | 1177           | 1227     | 991   | 1485     | 781    | 2920     | 1203  | 1519     | 1529  | 2026     | 1917  | 1923     | 581   | 1666     | 1060  | 1496     | 1553  | 2863     | 3960           | 5030     | 836          | 1530     | 519               | 505      | 377      | 738      | 2077                 | 2318     | <b>25074</b> | <b>34490</b> |
| rs7961581                 | 1022  | 1075     | 2814  | 3418     | 949   | 1178     | 1178   | 1144     | 0              | 0        | 1165           | 1207     | 1000  | 1488     | 784    | 2931     | 1213  | 1507     | 1521  | 2065     | 1919  | 1912     | 615   | 1617     | 1051  | 1485     | 1916  | 2931     | 3890           | 4917     | 885          | 1560     | 531               | 519      | 379      | 737      | 2079                 | 2334     | <b>24911</b> | <b>34025</b> |
| rs757210 <sup>9</sup>     | 969   | 1014     | 2763  | 3287     | 787   | 1112     | 1112   | 1104     | 0              | 0        | 0              | 0        | 0     | 0        | 0      | 0        | 1204  | 1509     | 0     | 0        | 1877  | 1852     | 616   | 1446     | 1058  | 1475     | 1542  | 1129     | 3841           | 4859     | 851          | 1555     | 520               | 509      | 376      | 749      | 2113                 | 2318     | <b>19629</b> | <b>23918</b> |
| rs8050136 <sup>10</sup>   | 1011  | 1066     | 2764  | 3332     | 910   | 1122     | 1122   | 1115     | 1161           | 1174     | 1167           | 1222     | 1003  | 1489     | 784    | 2912     | 1216  | 1513     | 1423  | 1908     | 1938  | 1942     | 612   | 1626     | 1060  | 1507     | 1915  | 2934     | 3864           | 4907     | 840          | 1530     | 522               | 511      | 372      | 751      | 2131                 | 2345     | <b>25815</b> | <b>34906</b> |

<sup>1</sup> rs1493694 was used as a proxy ( $r^2=1$  with rs10923931) in KORA

<sup>2</sup> rs2934381 was used as a proxy ( $r^2=1$  with rs10923931) in RS1, RS2 & RS3

<sup>3</sup> rs1470579 was used as a proxy ( $r^2=1$  with rs4402960) in DGI, MDC, GCI\_P & GCI\_US,

<sup>4</sup> rs7754840 was used as a proxy ( $r^2=1$  with rs10946398) in DGI, MDC, GCI\_P, GCI\_US & NHS

<sup>5</sup> rs849142 was used as a proxy ( $r^2=1$  with rs864745) in KORA

<sup>6</sup> rs1111875 was used as a proxy ( $r^2=1$  with rs5015480) in DGI, MDC, GCI\_P, GCI\_US, FUSION STAGE 1, FUSION STAGE 2, HUNT, METSIM, NHS, RS1, RS2, RS3, WTCCC & STENO DIABETES CENTRE

<sup>7</sup> rs7903146 was used as a proxy ( $r^2=0.798$  with rs7901695) in DGI, MDC, GCI\_P, GCI\_US, HUNT, METSIM, STENO DIABETES CENTRE

<sup>8</sup> rs12255372 was used as a proxy ( $r^2=0.578$  with rs7901695) in NHS, RS1 & RS2

<sup>9</sup> rs7501939 was used as a proxy ( $r^2=0.811$  with rs757210) in DGI, MDC, GCI\_P, GCI\_US, KORA & STENO DIABETES CENTRE

<sup>10</sup> rs9939609 was used as a proxy ( $r^2=1$  with rs8050136) in NHS

$r^2$  was determined using The International HapMap Project database (<http://www.hapmap.org>) release 23a/phaseII in the CEU population
