# Supplementary material
Source: PubMed Central journal article supplement (PMC2732984)
Supplement: kwp145_3.pdf [file kwp145_3.pdf]

**Web Table 2.** Genotype-specific odds ratios, genetic model parameter  $\lambda$ , and heterogeneity standard deviation  $\tau$  for the 4 different priors for  $\lambda$

| <b><i>NOTCH2</i></b>    |                    |                      |                     |
|-------------------------|--------------------|----------------------|---------------------|
| <b><i>Parameter</i></b> | <b><i>2.5%</i></b> | <b><i>median</i></b> | <b><i>97.5%</i></b> |
| OR <sub>Aa(a)</sub>     | 0.99               | 1.07                 | 1.15                |
| OR <sub>Aa(b)</sub>     | 0.99               | 1.07                 | 1.16                |
| OR <sub>Aa(c)</sub>     | 0.99               | 1.07                 | 1.15                |
| OR <sub>Aa(d)</sub>     | 0.99               | 1.07                 | 1.15                |
| OR <sub>aa(a)</sub>     | 0.99               | 1.11                 | 1.28                |
| OR <sub>aa(b)</sub>     | 0.99               | 1.10                 | 1.27                |
| OR <sub>aa(c)</sub>     | 0.99               | 1.11                 | 1.28                |
| OR <sub>aa(d)</sub>     | 0.99               | 1.11                 | 1.28                |
| $\lambda_{(a)}$         | 0.32               | 0.63                 | 0.97                |
| $\lambda_{(b)}$         | 0.33               | 0.69                 | 1.00                |
| $\lambda_{(c)}$         | 0.32               | 0.65                 | 0.99                |
| $\lambda_{(d)}$         | 0.50               | 0.50                 | 1.00                |
| $\tau_{(a)}$            | 0.09               | 0.20                 | 0.38                |
| $\tau_{(b)}$            | 0.08               | 0.18                 | 0.37                |
| $\tau_{(c)}$            | 0.08               | 0.19                 | 0.38                |
| $\tau_{(d)}$            | 0.08               | 0.21                 | 0.38                |
| <b><i>THADA</i></b>     |                    |                      |                     |
| <b><i>Parameter</i></b> | <b><i>2.5%</i></b> | <b><i>median</i></b> | <b><i>97.5%</i></b> |
| OR <sub>Aa(a)</sub>     | 1.00               | 1.08                 | 1.27                |
| OR <sub>Aa(b)</sub>     | 1.00               | 1.05                 | 1.25                |
| OR <sub>Aa(c)</sub>     | 1.00               | 1.07                 | 1.27                |
| OR <sub>Aa(d)</sub>     | 1.00               | 1.14                 | 1.22                |
| OR <sub>aa(a)</sub>     | 1.16               | 1.27                 | 1.50                |
| OR <sub>aa(b)</sub>     | 1.15               | 1.24                 | 1.47                |
| OR <sub>aa(c)</sub>     | 1.15               | 1.26                 | 1.49                |
| OR <sub>aa(d)</sub>     | 1.14               | 1.31                 | 1.48                |
| $\lambda_{(a)}$         | 0.02               | 0.32                 | 0.62                |
| $\lambda_{(b)}$         | 0.00               | 0.24                 | 0.61                |
| $\lambda_{(c)}$         | 0.01               | 0.29                 | 0.62                |
| $\lambda_{(d)}$         | 0.00               | 0.50                 | 0.50                |

|                         |                    |                      |                     |
|-------------------------|--------------------|----------------------|---------------------|
| $\tau_{(a)}$            | 0.00               | 0.04                 | 0.19                |
| $\tau_{(b)}$            | 0.00               | 0.04                 | 0.18                |
| $\tau_{(c)}$            | 0.00               | 0.04                 | 0.19                |
| $\tau_{(d)}$            | 0.00               | 0.04                 | 0.20                |
| <b><i>PPARG</i></b>     |                    |                      |                     |
| <b><i>Parameter</i></b> | <b><i>2.5%</i></b> | <b><i>median</i></b> | <b><i>97.5%</i></b> |
| OR <sub>Aa(a)</sub>     | 1.02               | 1.13                 | 1.34                |
| OR <sub>Aa(b)</sub>     | 1.01               | 1.13                 | 1.34                |
| OR <sub>Aa(c)</sub>     | 1.01               | 1.13                 | 1.34                |
| OR <sub>Aa(d)</sub>     | 1.02               | 1.12                 | 1.21                |
| OR <sub>aa(a)</sub>     | 1.06               | 1.26                 | 1.56                |
| OR <sub>aa(b)</sub>     | 1.05               | 1.26                 | 1.57                |
| OR <sub>aa(c)</sub>     | 1.05               | 1.26                 | 1.56                |
| OR <sub>aa(d)</sub>     | 1.05               | 1.24                 | 1.47                |
| $\lambda_{(a)}$         | 0.24               | 0.54                 | 0.71                |
| $\lambda_{(b)}$         | 0.15               | 0.54                 | 0.72                |
| $\lambda_{(c)}$         | 0.20               | 0.55                 | 0.71                |
| $\lambda_{(d)}$         | 0.50               | 0.50                 | 0.50                |
| $\tau_{(a)}$            | 0.17               | 0.31                 | 0.54                |
| $\tau_{(b)}$            | 0.16               | 0.31                 | 0.53                |
| $\tau_{(c)}$            | 0.17               | 0.31                 | 0.54                |
| $\tau_{(d)}$            | 0.18               | 0.30                 | 0.49                |
| <b><i>ADAMTS9</i></b>   |                    |                      |                     |
| <b><i>Parameter</i></b> | <b><i>2.5%</i></b> | <b><i>median</i></b> | <b><i>97.5%</i></b> |
| OR <sub>Aa(a)</sub>     | 1.01               | 1.08                 | 1.16                |
| OR <sub>Aa(b)</sub>     | 1.00               | 1.08                 | 1.17                |
| OR <sub>Aa(c)</sub>     | 1.01               | 1.08                 | 1.17                |
| OR <sub>Aa(d)</sub>     | 1.00               | 1.09                 | 1.12                |
| OR <sub>aa(a)</sub>     | 1.09               | 1.17                 | 1.27                |
| OR <sub>aa(b)</sub>     | 1.08               | 1.17                 | 1.27                |
| OR <sub>aa(c)</sub>     | 1.09               | 1.17                 | 1.28                |
| OR <sub>aa(d)</sub>     | 1.09               | 1.18                 | 1.26                |
| $\lambda_{(a)}$         | 0.12               | 0.48                 | 0.70                |
| $\lambda_{(b)}$         | 0.04               | 0.47                 | 0.71                |
| $\lambda_{(c)}$         | 0.09               | 0.47                 | 0.70                |
| $\lambda_{(d)}$         | 0.00               | 0.50                 | 0.50                |

|                         |                    |                      |                     |
|-------------------------|--------------------|----------------------|---------------------|
| $\tau_{(a)}$            | 0.00               | 0.06                 | 0.16                |
| $\tau_{(b)}$            | 0.01               | 0.06                 | 0.16                |
| $\tau_{(c)}$            | 0.01               | 0.06                 | 0.16                |
| $\tau_{(d)}$            | 0.00               | 0.06                 | 0.16                |
| <b><i>IGF2BP2</i></b>   |                    |                      |                     |
| <b><i>Parameter</i></b> | <b><i>2.5%</i></b> | <b><i>median</i></b> | <b><i>97.5%</i></b> |
| OR <sub>Aa(a)</sub>     | 1.05               | 1.11                 | 1.17                |
| OR <sub>Aa(b)</sub>     | 1.05               | 1.11                 | 1.17                |
| OR <sub>Aa(c)</sub>     | 1.05               | 1.11                 | 1.17                |
| OR <sub>Aa(d)</sub>     | 1.05               | 1.10                 | 1.15                |
| OR <sub>aa(a)</sub>     | 1.10               | 1.20                 | 1.32                |
| OR <sub>aa(b)</sub>     | 1.10               | 1.20                 | 1.32                |
| OR <sub>aa(c)</sub>     | 1.10               | 1.20                 | 1.32                |
| OR <sub>aa(d)</sub>     | 1.11               | 1.21                 | 1.33                |
| $\lambda_{(a)}$         | 0.39               | 0.55                 | 0.76                |
| $\lambda_{(b)}$         | 0.39               | 0.55                 | 0.78                |
| $\lambda_{(c)}$         | 0.39               | 0.55                 | 0.77                |
| $\lambda_{(d)}$         | 0.50               | 0.50                 | 0.50                |
| $\tau_{(a)}$            | 0.07               | 0.14                 | 0.24                |
| $\tau_{(b)}$            | 0.07               | 0.14                 | 0.24                |
| $\tau_{(c)}$            | 0.07               | 0.14                 | 0.24                |
| $\tau_{(d)}$            | 0.08               | 0.15                 | 0.25                |
| <b><i>WFSI</i></b>      |                    |                      |                     |
| <b><i>Parameter</i></b> | <b><i>2.5%</i></b> | <b><i>median</i></b> | <b><i>97.5%</i></b> |
| OR <sub>Aa(a)</sub>     | 1.01               | 1.05                 | 1.11                |
| OR <sub>Aa(b)</sub>     | 1.00               | 1.05                 | 1.11                |
| OR <sub>Aa(c)</sub>     | 1.01               | 1.05                 | 1.11                |
| OR <sub>Aa(d)</sub>     | 1.00               | 1.09                 | 1.13                |
| OR <sub>aa(a)</sub>     | 1.09               | 1.17                 | 1.26                |
| OR <sub>aa(b)</sub>     | 1.09               | 1.17                 | 1.26                |
| OR <sub>aa(c)</sub>     | 1.09               | 1.17                 | 1.26                |
| OR <sub>aa(d)</sub>     | 1.09               | 1.18                 | 1.27                |
| $\lambda_{(a)}$         | 0.07               | 0.33                 | 0.54                |
| $\lambda_{(b)}$         | 0.02               | 0.30                 | 0.53                |
| $\lambda_{(c)}$         | 0.04               | 0.31                 | 0.53                |
| $\lambda_{(d)}$         | 0.00               | 0.50                 | 0.50                |

|                         |                    |                      |                     |
|-------------------------|--------------------|----------------------|---------------------|
| $\tau_{(a)}$            | 0.01               | 0.09                 | 0.19                |
| $\tau_{(b)}$            | 0.01               | 0.09                 | 0.19                |
| $\tau_{(c)}$            | 0.01               | 0.09                 | 0.19                |
| $\tau_{(d)}$            | 0.01               | 0.08                 | 0.19                |
| <b><i>CDKAL1</i></b>    |                    |                      |                     |
| <b><i>Parameter</i></b> | <b><i>2.5%</i></b> | <b><i>median</i></b> | <b><i>97.5%</i></b> |
| OR <sub>Aa(a)</sub>     | 1.09               | 1.13                 | 1.18                |
| OR <sub>Aa(b)</sub>     | 1.09               | 1.13                 | 1.18                |
| OR <sub>Aa(c)</sub>     | 1.09               | 1.13                 | 1.18                |
| OR <sub>Aa(d)</sub>     | 1.10               | 1.14                 | 1.18                |
| OR <sub>aa(a)</sub>     | 1.21               | 1.29                 | 1.40                |
| OR <sub>aa(b)</sub>     | 1.20               | 1.29                 | 1.40                |
| OR <sub>aa(c)</sub>     | 1.21               | 1.30                 | 1.40                |
| OR <sub>aa(d)</sub>     | 1.21               | 1.29                 | 1.39                |
| $\lambda_{(a)}$         | 0.35               | 0.48                 | 0.65                |
| $\lambda_{(b)}$         | 0.34               | 0.48                 | 0.65                |
| $\lambda_{(c)}$         | 0.34               | 0.48                 | 0.65                |
| $\lambda_{(d)}$         | 0.50               | 0.50                 | 0.50                |
| $\tau_{(a)}$            | 0.00               | 0.07                 | 0.18                |
| $\tau_{(b)}$            | 0.00               | 0.07                 | 0.18                |
| $\tau_{(c)}$            | 0.00               | 0.06                 | 0.18                |
| $\tau_{(d)}$            | 0.00               | 0.07                 | 0.18                |
| <b><i>JAZF1</i></b>     |                    |                      |                     |
| <b><i>Parameter</i></b> | <b><i>2.5%</i></b> | <b><i>median</i></b> | <b><i>97.5%</i></b> |
| OR <sub>Aa(a)</sub>     | 1.05               | 1.09                 | 1.15                |
| OR <sub>Aa(b)</sub>     | 1.05               | 1.09                 | 1.15                |
| OR <sub>Aa(c)</sub>     | 1.05               | 1.09                 | 1.15                |
| OR <sub>Aa(d)</sub>     | 1.06               | 1.09                 | 1.12                |
| OR <sub>aa(a)</sub>     | 1.12               | 1.18                 | 1.25                |
| OR <sub>aa(b)</sub>     | 1.12               | 1.18                 | 1.25                |
| OR <sub>aa(c)</sub>     | 1.12               | 1.18                 | 1.25                |
| OR <sub>aa(d)</sub>     | 1.12               | 1.19                 | 1.26                |
| $\lambda_{(a)}$         | 0.31               | 0.53                 | 0.75                |
| $\lambda_{(b)}$         | 0.31               | 0.53                 | 0.76                |
| $\lambda_{(c)}$         | 0.31               | 0.53                 | 0.76                |
| $\lambda_{(d)}$         | 0.50               | 0.50                 | 0.50                |

|                         |                    |                      |                     |
|-------------------------|--------------------|----------------------|---------------------|
| $\tau_{(a)}$            | 0.00               | 0.05                 | 0.14                |
| $\tau_{(b)}$            | 0.00               | 0.05                 | 0.14                |
| $\tau_{(c)}$            | 0.00               | 0.05                 | 0.14                |
| $\tau_{(d)}$            | 0.00               | 0.05                 | 0.13                |
| <b>SLC30A8</b>          |                    |                      |                     |
| <b><i>Parameter</i></b> | <b><i>2.5%</i></b> | <b><i>median</i></b> | <b><i>97.5%</i></b> |
| OR <sub>Aa(a)</sub>     | 1.05               | 1.12                 | 1.19                |
| OR <sub>Aa(b)</sub>     | 1.05               | 1.12                 | 1.19                |
| OR <sub>Aa(c)</sub>     | 1.05               | 1.12                 | 1.19                |
| OR <sub>Aa(d)</sub>     | 1.07               | 1.10                 | 1.13                |
| OR <sub>aa(a)</sub>     | 1.14               | 1.22                 | 1.30                |
| OR <sub>aa(b)</sub>     | 1.14               | 1.21                 | 1.30                |
| OR <sub>aa(c)</sub>     | 1.14               | 1.21                 | 1.30                |
| OR <sub>aa(d)</sub>     | 1.14               | 1.21                 | 1.28                |
| $\lambda_{(a)}$         | 0.35               | 0.58                 | 0.75                |
| $\lambda_{(b)}$         | 0.35               | 0.58                 | 0.76                |
| $\lambda_{(c)}$         | 0.35               | 0.58                 | 0.76                |
| $\lambda_{(d)}$         | 0.50               | 0.50                 | 0.50                |
| $\tau_{(a)}$            | 0.00               | 0.04                 | 0.13                |
| $\tau_{(b)}$            | 0.00               | 0.04                 | 0.13                |
| $\tau_{(c)}$            | 0.00               | 0.04                 | 0.13                |
| $\tau_{(d)}$            | 0.00               | 0.04                 | 0.12                |
| <b>CDKN2A/B</b>         |                    |                      |                     |
| <b><i>Parameter</i></b> | <b><i>2.5%</i></b> | <b><i>median</i></b> | <b><i>97.5%</i></b> |
| OR <sub>Aa(a)</sub>     | 1.09               | 1.22                 | 1.37                |
| OR <sub>Aa(b)</sub>     | 1.09               | 1.22                 | 1.37                |
| OR <sub>Aa(c)</sub>     | 1.09               | 1.22                 | 1.37                |
| OR <sub>Aa(d)</sub>     | 1.16               | 1.20                 | 1.25                |
| OR <sub>aa(a)</sub>     | 1.30               | 1.46                 | 1.64                |
| OR <sub>aa(b)</sub>     | 1.30               | 1.46                 | 1.64                |
| OR <sub>aa(c)</sub>     | 1.31               | 1.46                 | 1.64                |
| OR <sub>aa(d)</sub>     | 1.35               | 1.45                 | 1.56                |
| $\lambda_{(a)}$         | 0.31               | 0.53                 | 0.66                |
| $\lambda_{(b)}$         | 0.31               | 0.52                 | 0.65                |
| $\lambda_{(c)}$         | 0.32               | 0.53                 | 0.66                |
| $\lambda_{(d)}$         | 0.50               | 0.50                 | 0.50                |

|                             |                    |                      |                     |
|-----------------------------|--------------------|----------------------|---------------------|
| $\tau_{(a)}$                | 0.00               | 0.05                 | 0.17                |
| $\tau_{(b)}$                | 0.00               | 0.05                 | 0.17                |
| $\tau_{(c)}$                | 0.00               | 0.05                 | 0.17                |
| $\tau_{(d)}$                | 0.00               | 0.05                 | 0.16                |
| <b><i>CDC123/CAMK1D</i></b> |                    |                      |                     |
| <b><i>Parameter</i></b>     | <b><i>2.5%</i></b> | <b><i>median</i></b> | <b><i>97.5%</i></b> |
| OR <sub>Aa(a)</sub>         | 1.05               | 1.09                 | 1.14                |
| OR <sub>Aa(b)</sub>         | 1.05               | 1.10                 | 1.14                |
| OR <sub>Aa(c)</sub>         | 1.05               | 1.10                 | 1.14                |
| OR <sub>Aa(d)</sub>         | 1.05               | 1.09                 | 1.13                |
| OR <sub>aa(a)</sub>         | 1.09               | 1.16                 | 1.27                |
| OR <sub>aa(b)</sub>         | 1.08               | 1.15                 | 1.27                |
| OR <sub>aa(c)</sub>         | 1.08               | 1.16                 | 1.27                |
| OR <sub>aa(d)</sub>         | 1.08               | 1.18                 | 1.27                |
| $\lambda_{(a)}$             | 0.33               | 0.59                 | 0.95                |
| $\lambda_{(b)}$             | 0.34               | 0.64                 | 1.00                |
| $\lambda_{(c)}$             | 0.34               | 0.62                 | 0.98                |
| $\lambda_{(d)}$             | 0.50               | 0.50                 | 1.00                |
| $\tau_{(a)}$                | 0.00               | 0.04                 | 0.15                |
| $\tau_{(b)}$                | 0.00               | 0.04                 | 0.14                |
| $\tau_{(c)}$                | 0.00               | 0.04                 | 0.14                |
| $\tau_{(d)}$                | 0.00               | 0.04                 | 0.15                |
| <b><i>HHEX/IDE</i></b>      |                    |                      |                     |
| <b><i>Parameter</i></b>     | <b><i>2.5%</i></b> | <b><i>median</i></b> | <b><i>97.5%</i></b> |
| OR <sub>Aa(a)</sub>         | 1.04               | 1.09                 | 1.15                |
| OR <sub>Aa(b)</sub>         | 1.04               | 1.09                 | 1.15                |
| OR <sub>Aa(c)</sub>         | 1.03               | 1.09                 | 1.14                |
| OR <sub>Aa(d)</sub>         | 1.07               | 1.10                 | 1.14                |
| OR <sub>aa(a)</sub>         | 1.13               | 1.20                 | 1.29                |
| OR <sub>aa(b)</sub>         | 1.13               | 1.20                 | 1.28                |
| OR <sub>aa(c)</sub>         | 1.12               | 1.20                 | 1.28                |
| OR <sub>aa(d)</sub>         | 1.13               | 1.21                 | 1.29                |
| $\lambda_{(a)}$             | 0.25               | 0.46                 | 0.63                |
| $\lambda_{(b)}$             | 0.24               | 0.45                 | 0.63                |
| $\lambda_{(c)}$             | 0.24               | 0.45                 | 0.63                |
| $\lambda_{(d)}$             | 0.50               | 0.50                 | 0.50                |

|                         |                    |                      |                     |
|-------------------------|--------------------|----------------------|---------------------|
| $\tau_{(a)}$            | 0.02               | 0.08                 | 0.16                |
| $\tau_{(b)}$            | 0.01               | 0.08                 | 0.16                |
| $\tau_{(c)}$            | 0.01               | 0.08                 | 0.16                |
| $\tau_{(d)}$            | 0.01               | 0.08                 | 0.16                |
| <b><i>TCF7L2</i></b>    |                    |                      |                     |
| <b><i>Parameter</i></b> | <b><i>2.5%</i></b> | <b><i>median</i></b> | <b><i>97.5%</i></b> |
| OR <sub>Aa(a)</sub>     | 1.19               | 1.31                 | 1.46                |
| OR <sub>Aa(b)</sub>     | 1.19               | 1.32                 | 1.46                |
| OR <sub>Aa(c)</sub>     | 1.19               | 1.32                 | 1.45                |
| OR <sub>Aa(d)</sub>     | 1.18               | 1.29                 | 1.41                |
| OR <sub>aa(a)</sub>     | 1.36               | 1.61                 | 1.91                |
| OR <sub>aa(b)</sub>     | 1.36               | 1.61                 | 1.92                |
| OR <sub>aa(c)</sub>     | 1.36               | 1.61                 | 1.91                |
| OR <sub>aa(d)</sub>     | 1.38               | 1.66                 | 1.98                |
| $\lambda_{(a)}$         | 0.50               | 0.58                 | 0.66                |
| $\lambda_{(b)}$         | 0.50               | 0.58                 | 0.66                |
| $\lambda_{(c)}$         | 0.50               | 0.58                 | 0.66                |
| $\lambda_{(d)}$         | 0.50               | 0.50                 | 0.50                |
| $\tau_{(a)}$            | 0.21               | 0.31                 | 0.49                |
| $\tau_{(b)}$            | 0.21               | 0.31                 | 0.49                |
| $\tau_{(c)}$            | 0.21               | 0.31                 | 0.49                |
| $\tau_{(d)}$            | 0.22               | 0.33                 | 0.52                |
| <b><i>KCNJ11</i></b>    |                    |                      |                     |
| <b><i>Parameter</i></b> | <b><i>2.5%</i></b> | <b><i>median</i></b> | <b><i>97.5%</i></b> |
| OR <sub>Aa(a)</sub>     | 1.07               | 1.11                 | 1.16                |
| OR <sub>Aa(b)</sub>     | 1.07               | 1.11                 | 1.16                |
| OR <sub>Aa(c)</sub>     | 1.07               | 1.11                 | 1.16                |
| OR <sub>Aa(d)</sub>     | 1.09               | 1.12                 | 1.16                |
| OR <sub>aa(a)</sub>     | 1.18               | 1.27                 | 1.35                |
| OR <sub>aa(b)</sub>     | 1.18               | 1.27                 | 1.35                |
| OR <sub>aa(c)</sub>     | 1.18               | 1.26                 | 1.35                |
| OR <sub>aa(d)</sub>     | 1.18               | 1.26                 | 1.34                |
| $\lambda_{(a)}$         | 0.31               | 0.44                 | 0.59                |
| $\lambda_{(b)}$         | 0.31               | 0.44                 | 0.59                |
| $\lambda_{(c)}$         | 0.31               | 0.44                 | 0.59                |
| $\lambda_{(d)}$         | 0.50               | 0.50                 | 0.50                |

|                           |                    |                      |                     |
|---------------------------|--------------------|----------------------|---------------------|
| $\tau_{(a)}$              | 0.00               | 0.07                 | 0.16                |
| $\tau_{(b)}$              | 0.00               | 0.07                 | 0.16                |
| $\tau_{(c)}$              | 0.00               | 0.07                 | 0.16                |
| $\tau_{(d)}$              | 0.00               | 0.07                 | 0.16                |
| <b><i>TSPAN8/LGR5</i></b> |                    |                      |                     |
| <b><i>Parameter</i></b>   | <b><i>2.5%</i></b> | <b><i>median</i></b> | <b><i>97.5%</i></b> |
| OR <sub>Aa(a)</sub>       | 1.02               | 1.07                 | 1.13                |
| OR <sub>Aa(b)</sub>       | 1.02               | 1.07                 | 1.13                |
| OR <sub>Aa(c)</sub>       | 1.02               | 1.07                 | 1.13                |
| OR <sub>Aa(d)</sub>       | 1.03               | 1.07                 | 1.12                |
| OR <sub>aa(a)</sub>       | 1.04               | 1.13                 | 1.23                |
| OR <sub>aa(b)</sub>       | 1.04               | 1.12                 | 1.23                |
| OR <sub>aa(c)</sub>       | 1.04               | 1.12                 | 1.23                |
| OR <sub>aa(d)</sub>       | 1.04               | 1.14                 | 1.24                |
| $\lambda_{(a)}$           | 0.31               | 0.58                 | 0.93                |
| $\lambda_{(b)}$           | 0.31               | 0.60                 | 0.99                |
| $\lambda_{(c)}$           | 0.31               | 0.59                 | 0.97                |
| $\lambda_{(d)}$           | 0.50               | 0.50                 | 1.00                |
| $\tau_{(a)}$              | 0.02               | 0.11                 | 0.21                |
| $\tau_{(b)}$              | 0.03               | 0.10                 | 0.21                |
| $\tau_{(c)}$              | 0.03               | 0.11                 | 0.21                |
| $\tau_{(d)}$              | 0.04               | 0.11                 | 0.22                |
| <b><i>TCF2</i></b>        |                    |                      |                     |
| <b><i>Parameter</i></b>   | <b><i>2.5%</i></b> | <b><i>median</i></b> | <b><i>97.5%</i></b> |
| OR <sub>Aa(a)</sub>       | 1.01               | 1.06                 | 1.13                |
| OR <sub>Aa(b)</sub>       | 1.01               | 1.07                 | 1.14                |
| OR <sub>Aa(c)</sub>       | 1.01               | 1.07                 | 1.14                |
| OR <sub>Aa(d)</sub>       | 1.01               | 1.06                 | 1.13                |
| OR <sub>aa(a)</sub>       | 1.01               | 1.10                 | 1.20                |
| OR <sub>aa(b)</sub>       | 1.01               | 1.10                 | 1.20                |
| OR <sub>aa(c)</sub>       | 1.01               | 1.10                 | 1.20                |
| OR <sub>aa(d)</sub>       | 1.01               | 1.10                 | 1.20                |
| $\lambda_{(a)}$           | 0.32               | 0.67                 | 0.97                |
| $\lambda_{(b)}$           | 0.32               | 0.72                 | 1.00                |
| $\lambda_{(c)}$           | 0.32               | 0.70                 | 0.99                |
| $\lambda_{(d)}$           | 0.50               | 0.50                 | 1.00                |



|                         |                    |                      |                     |
|-------------------------|--------------------|----------------------|---------------------|
| $\tau_{(a)}$            | 0.01               | 0.10                 | 0.22                |
| $\tau_{(b)}$            | 0.01               | 0.10                 | 0.22                |
| $\tau_{(c)}$            | 0.01               | 0.10                 | 0.22                |
| $\tau_{(d)}$            | 0.00               | 0.09                 | 0.21                |
| <b><i>FTO</i></b>       |                    |                      |                     |
| <b><i>Parameter</i></b> | <b><i>2.5%</i></b> | <b><i>median</i></b> | <b><i>97.5%</i></b> |
| $OR_{Aa(a)}$            | 1.12               | 1.16                 | 1.21                |
| $OR_{Aa(b)}$            | 1.12               | 1.16                 | 1.21                |
| $OR_{Aa(c)}$            | 1.12               | 1.16                 | 1.21                |
| $OR_{Aa(d)}$            | 1.12               | 1.16                 | 1.19                |
| $OR_{aa(a)}$            | 1.25               | 1.33                 | 1.41                |
| $OR_{aa(b)}$            | 1.25               | 1.33                 | 1.41                |
| $OR_{aa(c)}$            | 1.25               | 1.33                 | 1.41                |
| $OR_{aa(d)}$            | 1.26               | 1.34                 | 1.42                |
| $\lambda_{(a)}$         | 0.42               | 0.53                 | 0.66                |
| $\lambda_{(b)}$         | 0.42               | 0.53                 | 0.66                |
| $\lambda_{(c)}$         | 0.42               | 0.53                 | 0.66                |
| $\lambda_{(d)}$         | 0.50               | 0.50                 | 0.50                |
| $\tau_{(a)}$            | 0.00               | 0.06                 | 0.15                |
| $\tau_{(b)}$            | 0.00               | 0.06                 | 0.15                |
| $\tau_{(c)}$            | 0.01               | 0.06                 | 0.15                |
| $\tau_{(d)}$            | 0.00               | 0.07                 | 0.15                |
